# Supplementary material
Source: Research Square preprint supplement (doi:10.21203/rs.3.rs-9485151/v1)

**Graphical abstract**


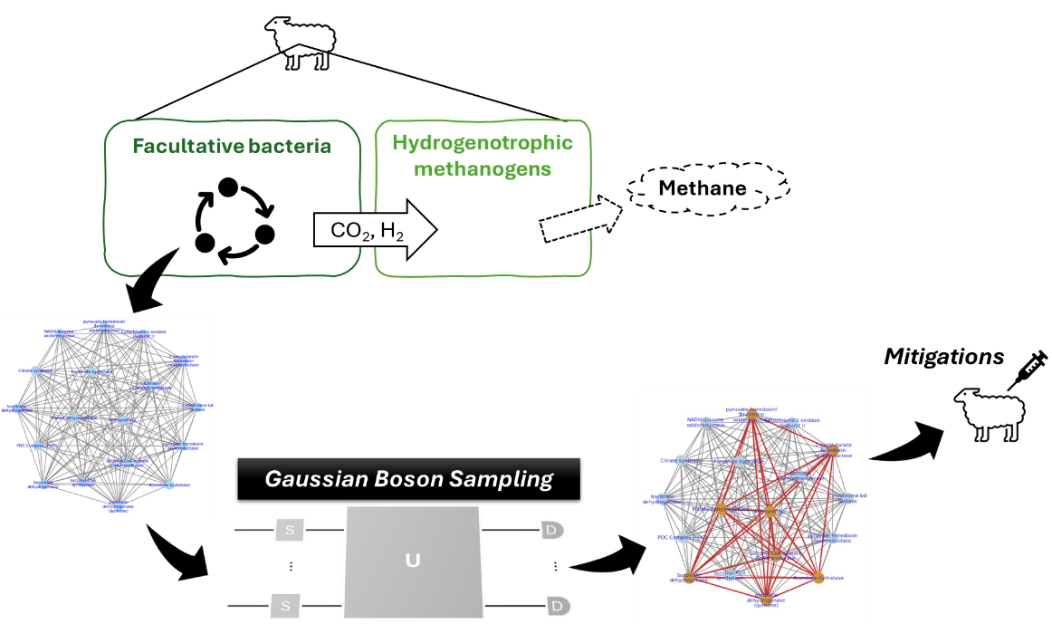

Supplement: Supplementary file 1 [file 15769380d7d17aade695dbd9.docx]
